# Supplementary material for: Remarkably enhanced Fenton-like catalytic activity and recyclability of Fe-based metallic glass by alternating magnetic field: mechanisms and industrial applications
Source: Royal Society of Chemistry journal article supplement (doi:10.1039/d2ta06216j), 2022-01-01
Supplement: d2ta06216j1.pdf [file d2ta06216j1.pdf]

## Supporting Information for

### Remarkably enhanced Fenton-like catalytic activity and recyclability of Fe-based metallic glass by alternating magnetic field: mechanisms and industrial applications

Yun-Xuan Ge<sup>1</sup>, Peng-Yu Zhu<sup>1</sup>, Yao Yu<sup>1</sup>, Lai-Chang Zhang<sup>2</sup>, Cheng Zhang<sup>1,\*</sup> and Lin Liu<sup>1,\*</sup>

<sup>1</sup>State Key Laboratory of Materials Processing and Die & Mold Technology, School of Materials Science and Engineering, Huazhong University of Science and Technology, Wuhan 430074, China

<sup>2</sup>School of Engineering, Edith Cowan University, 270 Joondalup Drive, Joondalup, Perth, WA 6027, Australia

\*Corresponding authors:

**Email:** Cheng Zhang (czhang@hust.edu.cn) and Lin Liu (lliu2000@mail.hust.edu.cn )

#### **This PDF file includes:**

Supporting text  
Figures S1 to S10  
Tables S1 to S2  
SI References

#### **Other supporting materials for this manuscript include the following:**

Movies S1 to S3.

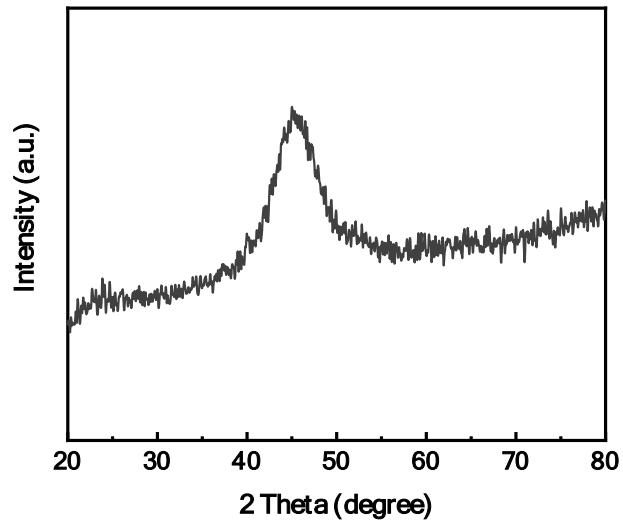

**Figure S1.** X-ray diffraction (XRD) pattern of the as-received  $\text{Fe}_{78}\text{Si}_9\text{B}_{13}$  amorphous ribbon

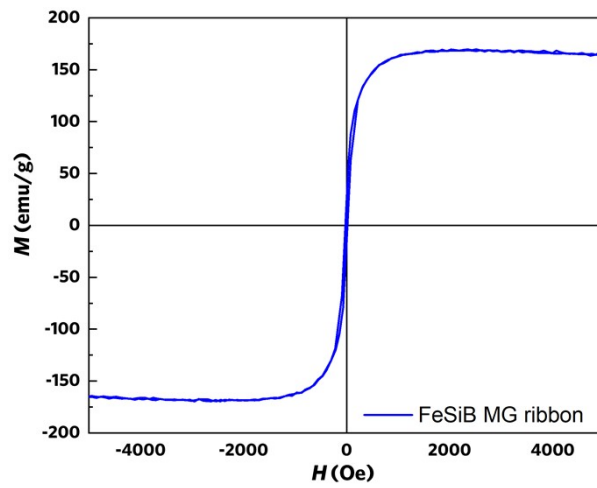

**Figure S2.** Hysteresis loop of the as-received  $\text{Fe}_{78}\text{Si}_9\text{B}_{13}$  amorphous ribbon measured with a vibrating sample magnetometer (VSM), showing the saturation magnetization process

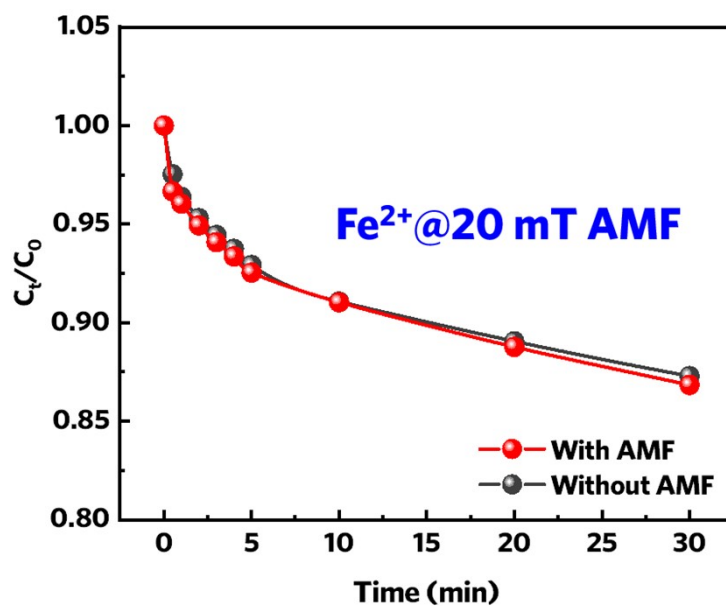

**Figure S3.** Effect of AMF on the degradation performance of a Fenton system (0.81 mg/L Fe<sup>2+</sup> ion and 5 mM H<sub>2</sub>O<sub>2</sub>). (RhB concentration: 10 mg/L; Initial reaction temperature: 302 K; pH=3; *B*=20 mT).

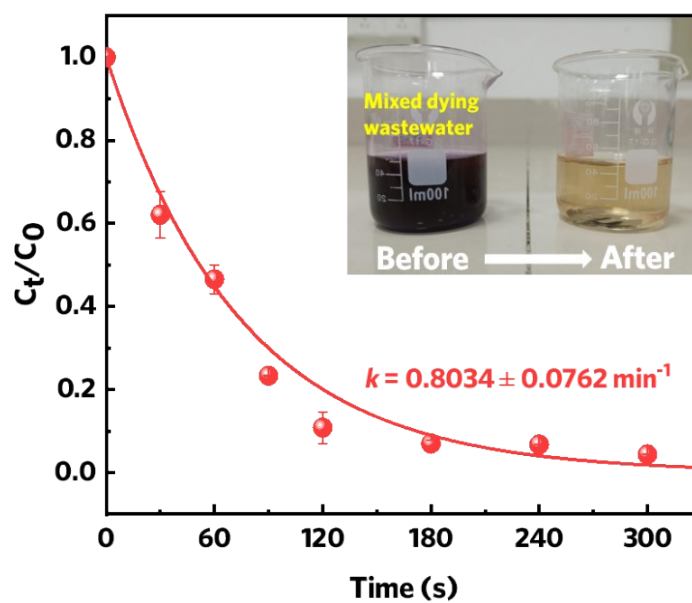

**Figure S4.** Removal rate of a mixed dye (RhB, methyl orange, methyl blue (MB), methylene blue and brilliant red 3BA) by the FeSiB MG under AMF with a magnetic strength of 20.11 mT.

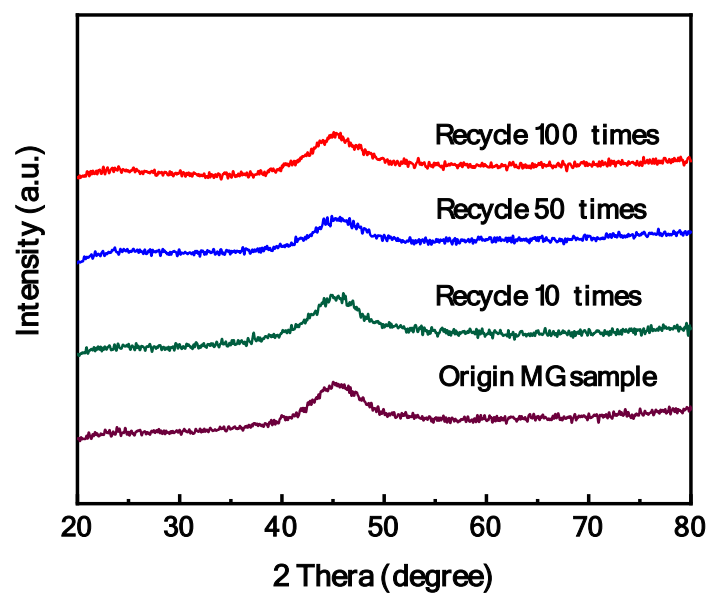

**Figure S5.** XRD patterns of the FeSiB MG ribbon after reused for various cycle numbers with AMF.

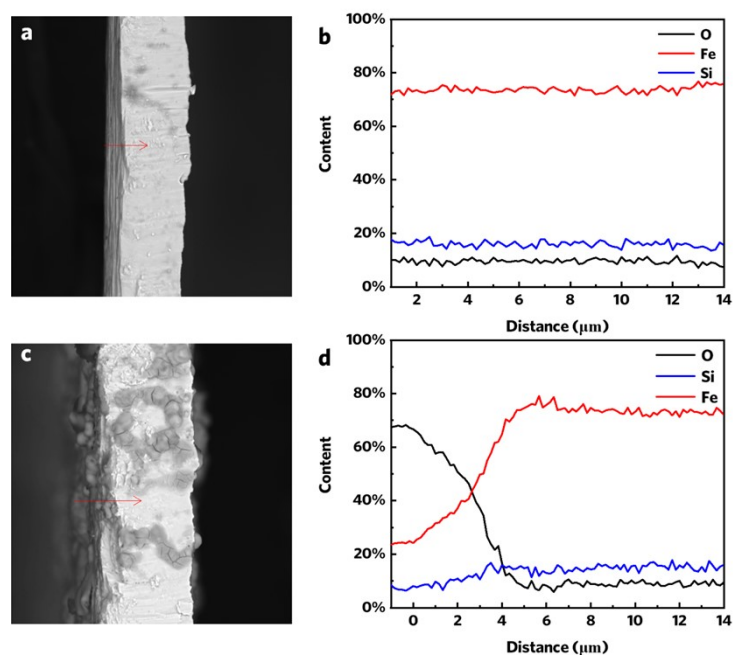

**Figure S6.** a-b) Cross-section morphology and EDX line scanning on the 100<sup>th</sup>-reused FeSiB MG ribbon with AMF; c-d) Cross-section morphology and EDX line scanning on the 10<sup>th</sup>-reused FeSiB MG ribbon without AMF.

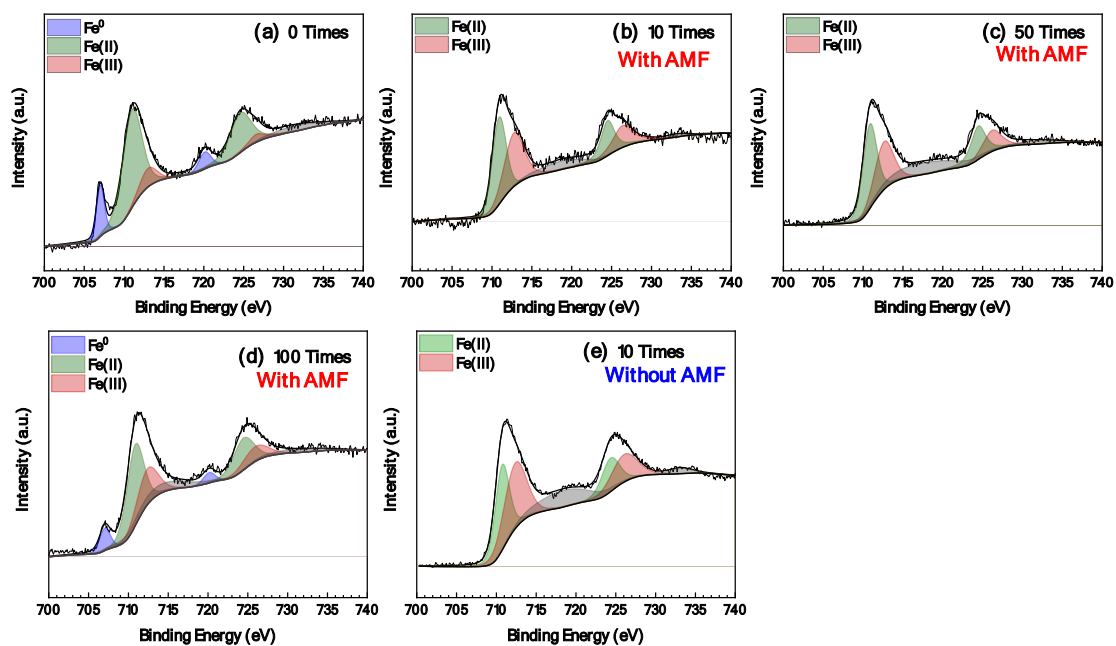

**Figure S7.** XPS spectra of Fe 2p of the fresh and reused FeSiB MG ribbon after the different reuse times with and without AMF. a) fresh sample; b) the 10<sup>th</sup> reused sample with AMF; c) the 50<sup>th</sup> reused sample with AMF; d) the 100<sup>th</sup> reused sample with AMF; and e) the 10<sup>th</sup> reused sample without AMF.

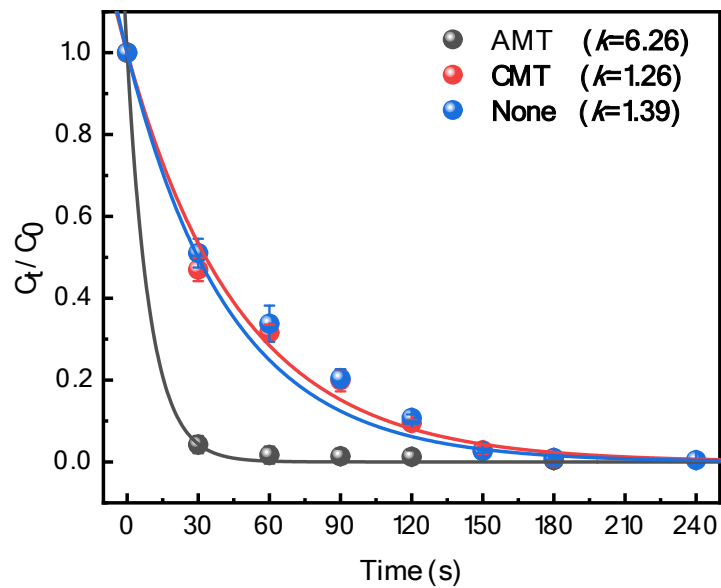

**Figure S8.** Removal rate of rhodamine B (RhB) by  $\text{Fe}_{78}\text{Si}_9\text{B}_{13}$  MG catalysts under alternating magnetic field (AMT,  $B_{\text{max}}=20.11$  mT) and constant magnetic field (CMT,  $B=20.11$  mT), compared with that without applying external field. (RhB concentration: 10 mg/L;  $\text{H}_2\text{O}_2$  concentration: 5 mM; Initial reaction temperature: 302 K; pH=3).

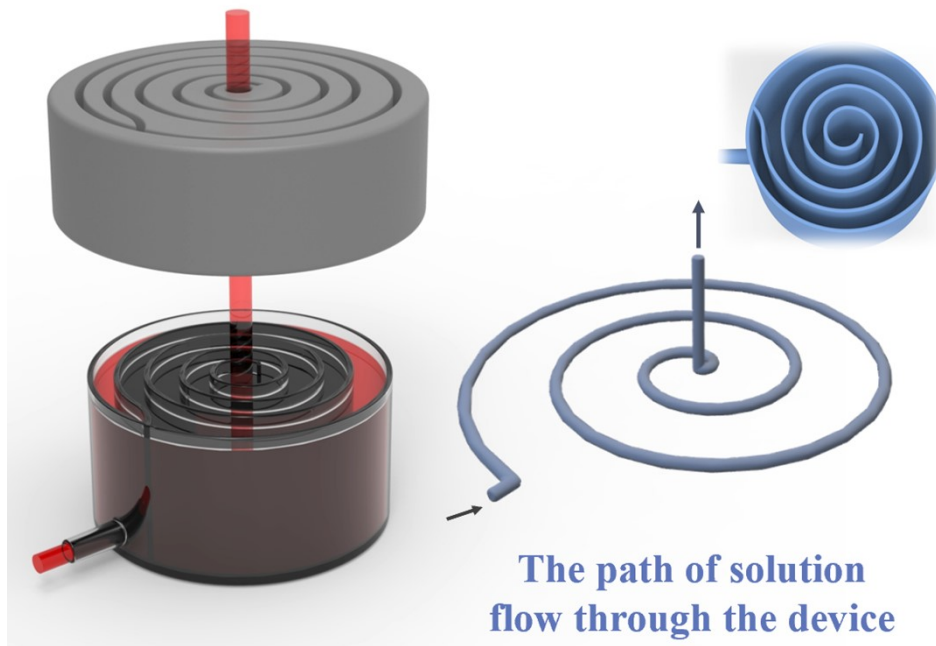

**Figure S9.** Schematic diagram of the flow-through wastewater treatment device, showing how the water flow in this device.

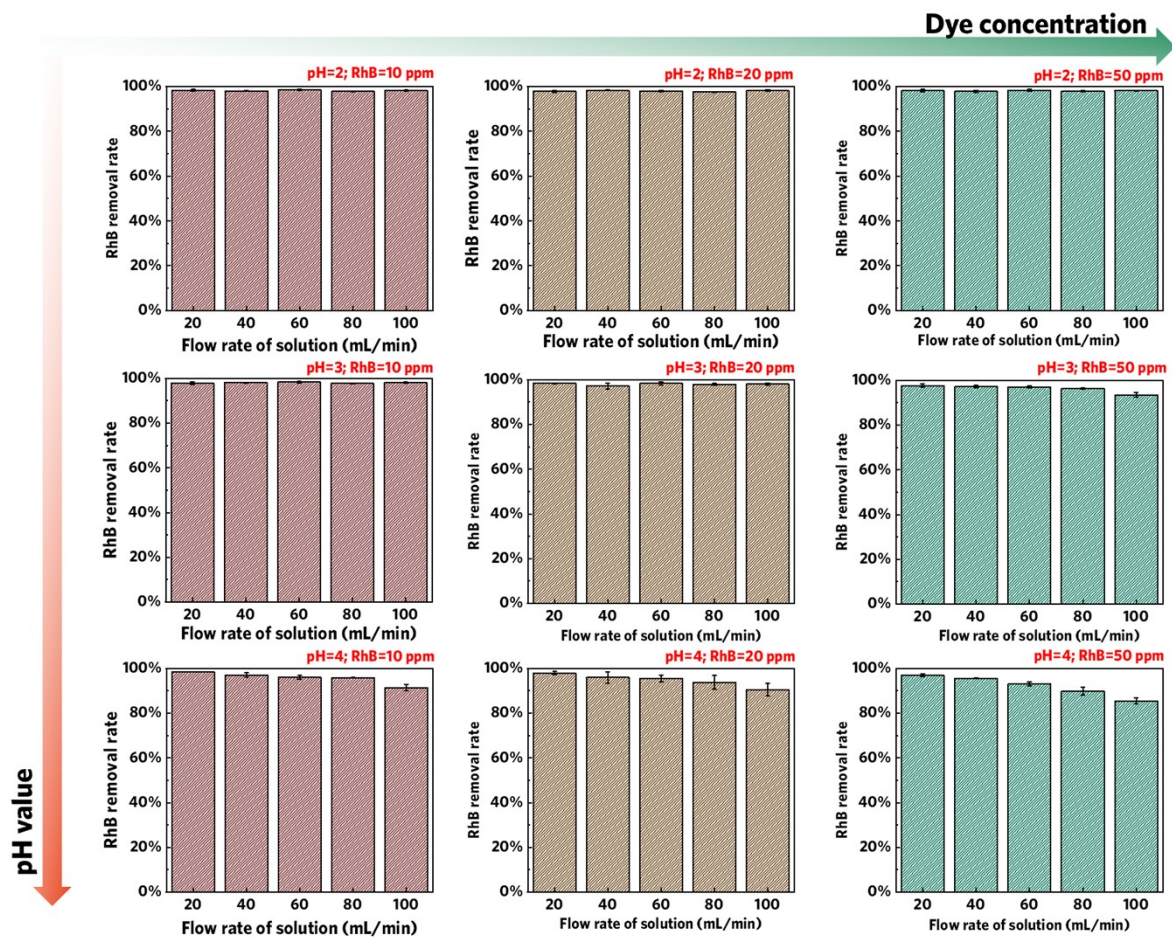

**Figure S10.** Effects of dye concentration, pH value and flow velocity on the degradation efficiency of RhB under a 20 mT AMF. d) Performance in continuous treatment of RhB under AMF.



**Table S1.** Comparison of catalytic activity and reusability of Fe-based amorphous and crystalline Fenton-type catalysts.

| Catalysts                                                                            | Organic pollutants   | Concentration<br>(ppm) | Area dosage<br>(m <sup>2</sup> L <sup>-1</sup> ) <sup>a</sup> | K <sub>SA</sub><br>(L m <sup>-2</sup> min <sup>-1</sup> ) <sup>b</sup> | K <sub>obs</sub><br>(min <sup>-1</sup> ) | Recyclability<br>(times) | Refs. |
|--------------------------------------------------------------------------------------|----------------------|------------------------|---------------------------------------------------------------|------------------------------------------------------------------------|------------------------------------------|--------------------------|-------|
| <b>Metallic glasses</b>                                                              |                      |                        |                                                               |                                                                        |                                          |                          |       |
| Fe <sub>78</sub> Si <sub>9</sub> B <sub>13</sub>                                     | Methyl Orange        | 20                     | 0.06                                                          | 6.43                                                                   | 0.386                                    | 4                        | 1     |
|                                                                                      | Rhodamine B          | 20                     | 0.99                                                          | 7.32                                                                   | 0.725                                    | 4                        | 2     |
|                                                                                      | Methyl Blue          | 20                     | 0.06                                                          | 6.35                                                                   | 0.381                                    | 4                        | 1     |
|                                                                                      | Methyl Blue          | 20                     | 0.06                                                          | 5.93                                                                   | 0.356                                    | 4                        | 3     |
|                                                                                      | Methylene Blue       | 20                     | 0.06                                                          | 10.67                                                                  | 0.64                                     | 20                       | 4     |
|                                                                                      | Brilliant Red 3BA    | 20                     | 0.06                                                          | 6.2                                                                    | 0.372                                    | 4                        | 3     |
|                                                                                      | Brilliant Red 3BA    | 50                     | 0.26                                                          | 2.52                                                                   | 0.654                                    | 4                        | 5     |
|                                                                                      | Brilliant yellow 3GP | 20                     | 0.06                                                          | 7.76                                                                   | 0.466                                    | 4                        | 3     |
|                                                                                      | Malachite Green      | 20                     | 0.06                                                          | 8.65                                                                   | 0.519                                    | 4                        | 3     |
|                                                                                      | Orange II            | 200                    | -                                                             | -                                                                      | 0.32                                     | 7                        | 6     |
| Fe <sub>79</sub> Si <sub>5</sub> B <sub>16</sub>                                     | Orange G             | 100                    | 0.005                                                         | 0.8                                                                    | 0.004                                    | 8                        | 7     |
| Fe <sub>78</sub> Si <sub>8</sub> B <sub>14</sub>                                     | Orange II            | 200                    | 0.83                                                          | 3.03                                                                   | 0.252                                    | 4                        | 7     |
| Fe <sub>80</sub> P <sub>13</sub> C <sub>7</sub>                                      | Methyl Blue          | 100                    | -                                                             | -                                                                      | 0.56                                     | 19                       | 9     |
| Fe <sub>76</sub> B <sub>12</sub> Si <sub>9</sub> Y <sub>3</sub>                      | Methyl Blue          | 20                     | -                                                             | -                                                                      | -                                        | 13                       | 10    |
| Fe <sub>78</sub> (Si, B) <sub>22</sub>                                               | Acid Orange II       | 100                    | 0.062                                                         | 2                                                                      | 0.125                                    | -                        | 11    |
| Fe <sub>73.5</sub> Si <sub>13.5</sub> B <sub>9</sub> Cu <sub>1</sub> Nb <sub>3</sub> | Methyl Orange        | 20                     | 0.06                                                          | 2.52                                                                   | 0.152                                    | 4                        | 1     |
|                                                                                      | Methyl Blue          | 20                     | 0.06                                                          | 3.35                                                                   | 0.201                                    | 4                        | 1     |
|                                                                                      | Eosin Y              | 100                    | 0.099                                                         | 1.85                                                                   | 0.183                                    | 10                       | 12    |
|                                                                                      | Malachite Green      | 20                     | 0.099                                                         | 1.64                                                                   | 0.162                                    | 5                        | 13    |

|                                                               |                    |       |         |                       |        |    |    |
|---------------------------------------------------------------|--------------------|-------|---------|-----------------------|--------|----|----|
| $\text{Fe}_{66.3}\text{B}_{16.6}\text{Y}_{17.1}$              | Orange G           | 100   | 0.099   | 9.4                   | 0.011  | 11 | 7  |
| $\text{Fe}_{83}\text{Si}_2\text{B}_{11}\text{P}_3\text{C}_1$  | Rhodamine B        | 20    | 0.005   | 45                    | 0.09   | 35 | 14 |
| $\text{Fe}_{63}\text{Cr}_5\text{Nb}_4\text{Y}_6\text{B}_{22}$ | Methyl Blue        | 100   | 0.002   | -                     | 0.182  | 3  | 15 |
| $\text{Fe}_{50}\text{Ni}_{30}\text{P}_{13}\text{C}_7$         | Brilliant Black BN | 20    | -       | 1.77                  | 0.175  | 1  | 16 |
| $\text{Fe}_{81}\text{Si}_2\text{B}_{10}\text{P}_6\text{Cu}_1$ | Methylene Blue     | 100   | 0.396   | 44.95                 | 1.78   | 20 | 17 |
| $\text{Cu}_{47.5}\text{Zr}_{46}\text{Al}_{6.5}$               | Acid Orange II     | 100   | 0.1     | 1.65                  | 0.165  | 10 | 18 |
| $\text{Cu}_{46}\text{Zr}_{44.5}\text{Al}_{7.5}\text{Gd}_2$    | Acid Orange II     | 100   | -       | -                     | 0.48   | 80 | 19 |
| <b>Iron inos</b>                                              |                    |       |         |                       |        |    |    |
| $\text{Fe}^{2+}$                                              | Rhodamine B        | -     | -       | -                     | 0.12   | 1  | 20 |
|                                                               | Rhodamine B        | -     | -       | -                     | 2.22   | 1  | 20 |
| <b>Zero valent metal</b>                                      |                    |       |         |                       |        |    |    |
| nZVI                                                          | Methyl Orange      | 50    | 23.2    | 0.022                 | 0.56   | 1  | 21 |
| Micro-ZVI                                                     | Acid Orange II     | 105   | 1.42    | 0.27                  | 0.38   | -  | 22 |
| FeCo                                                          | Acid Orange II     | 105.1 | 2134.8  | $1.2 \times 10^{-5}$  | 0.025  | 4  | 23 |
| FeCu/CNF                                                      | Orange II          | 100   | 133     | $4.3 \times 10^{-5}$  | 0.057  | 5  | 24 |
| <b>Minerals</b>                                               |                    |       |         |                       |        |    |    |
| Fe(II)/Hematite NP                                            | Rhodamine B        | 5     | 83.6    | 0.0004                | 0.033  | 5  | 25 |
| Graphite tailings                                             | Rhodamine B        | 100   | 497     | $1.6 \times 10^{-4}$  | 0.077  | 1  | 26 |
| <b>Fe-Oixdes</b>                                              |                    |       |         |                       |        |    |    |
| $\text{BiFeO}_3$                                              | Rhodamine B        | 4.79  | 4.17    | 0.007                 | 0.0289 | 5  | 27 |
| $\text{Fe}_2\text{O}_3/\text{FCNT}$                           | Methyl Blue        | 8     | 8.24    | 0.006                 | 0.053  | 5  | 28 |
| $\text{Fe}_3\text{O}_4$                                       | Rhodamine B        | 10    | 0.003   | 6.33                  | 0.019  | 6  | 29 |
| $\text{Fe}_3\text{O}_4/\text{MIL-101}$                        | Rhodamine B        | 10    | 16858.9 | $9.23 \times 10^{-6}$ | 0.164  | 5  | 30 |
| $\text{Fe}_3\text{O}_4$                                       | Rhodamine B        | 4.79  | 1152    | $2.44 \times 10^{-5}$ | 0.0281 | 6  | 31 |
| <b>Single-atom catalyst</b>                                   |                    |       |         |                       |        |    |    |

|                                                                                                                                     |                   |      |       |                       |        |     |                  |
|-------------------------------------------------------------------------------------------------------------------------------------|-------------------|------|-------|-----------------------|--------|-----|------------------|
| Fe-g-C <sub>3</sub> N <sub>4</sub> /GMC                                                                                             | Rhodamine B       | 50   | 3705  | 5.64*10 <sup>-5</sup> | 0.209  | 7   | 32               |
| <b>Metal phosphides</b>                                                                                                             |                   |      |       |                       |        |     |                  |
| Fe <sup>2+</sup> /FeP                                                                                                               | Methylene Blue    | 100  | 12.16 | 1.2*10 <sup>-4</sup>  | 0.0015 | 7   | 32               |
| Cu <sub>3</sub> P                                                                                                                   | Sulfamethoxazole  | 0.5  | 0.32  | 0.625                 | 0.20   | 1   | 33               |
| Co <sub>2</sub> P/C compsites                                                                                                       | Bisphenol A       | 22.8 | 6.28  | 0.42                  | 2.644  | 5   | 34               |
| <b>3D-printed MGs</b>                                                                                                               |                   |      |       |                       |        |     |                  |
| Fe <sub>70</sub> Cr <sub>5</sub> Ni <sub>3</sub> Mo <sub>3</sub> W <sub>9</sub> Si <sub>5</sub> B <sub>5</sub>                      | Brilliant Red 3BA | 20   | -     | -                     | 0.586  | 45  | 35               |
| Fe <sub>68</sub> Cr <sub>2</sub> Ni <sub>5</sub> Mo <sub>5</sub> P <sub>12.5</sub> C <sub>5</sub> B <sub>2.5</sub> /Cu              | Rhodamine B       | 20   | 0.019 | 34.3                  | 0.64   | 73  | 36               |
| Re-activated Fe <sub>68</sub> Cr <sub>2</sub> Ni <sub>5</sub> Mo <sub>5</sub> P <sub>12.5</sub> C <sub>5</sub> B <sub>2.5</sub> /Cu | Rhodamine B       | 20   | 0.019 | 43                    | 0.83   | 100 | 36               |
| <b>This work</b>                                                                                                                    |                   |      |       |                       |        |     |                  |
| Fe <sub>78</sub> Si <sub>9</sub> B <sub>13</sub> with AMF                                                                           | Rhodamine B       | 10   | 0.04  | 157.5                 | 6.3    | 100 | <b>This Work</b> |
| Fe <sub>78</sub> Si <sub>9</sub> B <sub>13</sub> without AMF                                                                        | Rhodamine B       | 10   | 0.04  | 33.38                 | 1.34   | 15  |                  |

**Table S2.** EIS fitting results under AMF and without AMF.

| $B$ (mT) | $R_s$ ( $\Omega\text{cm}^2$ ) | $R_f$ ( $\Omega\text{cm}^2$ ) | $R_{ct}$ ( $\Omega\text{cm}^2$ ) | $\text{CPE}_1$<br>( $\mu\Omega^{-1}\text{cm}^{-2}\text{S}^n$ ) | $n_1$     | $\text{CPE}_{dl}$<br>( $\mu\Omega^{-1}\text{cm}^{-2}\text{S}^n$ ) | $n_{dl}$  | $C_{dl}$<br>( $\mu\text{F cm}^{-2}$ ) | $d_{eff}$<br>(nm) |
|----------|-------------------------------|-------------------------------|----------------------------------|----------------------------------------------------------------|-----------|-------------------------------------------------------------------|-----------|---------------------------------------|-------------------|
| 0        | 73.28±0.53                    | 51.96±0.03                    | 96.76±1.10                       | 74.68±1.43                                                     | 0.79±0.01 | 13.6±0.08                                                         | 0.82±0.01 | 2.63±0.04                             | 5.26              |
| 5        | 72.64±0.19                    | 34.46±0.05                    | 80.56±0.93                       | 43.06±0.50                                                     | 0.81±0.01 | 16.25±0.11                                                        | 0.83±0.01 | 3.42±0.05                             | 4.04              |
| 10       | 69.55±0.87                    | 32.65±0.01                    | 76.45±1.59                       | 44.65±0.36                                                     | 0.83±0.01 | 16.12±0.22                                                        | 0.83±0.01 | 3.51±0.04                             | 3.94              |
| 20       | 66.55±0.37                    | 30.78±0.03                    | 70.62±0.87                       | 41.95±0.42                                                     | 0.83±0.01 | 16.04±0.09                                                        | 0.83±0.01 | 3.47±0.07                             | 3.98              |

## Supplementary References

- [1] Jia, Z.; Kang, J.; Zhang, W.C.; Wang, M.; Yang, C.; Sun, H.; Habibi, D.; Zhang, L.C. Surface Aging Behavior of Fe-Based Amorphous Alloys as Catalysts During Heterogeneous Photo Fenton-Like Process for Water Treatment. *Appl. Catal. B: Environ.* **2017**, 204, 537-547.
- [2] Wang, X.; Pan, Y.; Zhu, Z.; Wu, J. Efficient Degradation of Rhodamine B Using Fe-Based Metallic Glass Catalyst by Fenton-Like Process. *Chemosphere*, **2014**, 117, 638-643.
- [3] Jia, Z.; Duan, X.; Qin, P.; Zhang, W.; Wang, W.; Yang, C.; Sun, H.; Wang, S.; Zhang, L.-C. Disordered Atomic Packing Structure of Metallic Glass: Toward Ultrafast Hydroxyl Radicals Production Rate and Strong Electron Transfer Ability in Catalytic Performance. *Adv. Funct. Mater.*, **2017**, 27, 1702258.
- [4] Jia, Z.; Duan, X.; Zhang, W.; Wang, W.; Sun, H.; Wang, S.; Zhang, L.-C. Ultra-Sustainable Fe<sub>78</sub>Si<sub>9</sub>B<sub>13</sub> Metallic Glass as a Catalyst for Activation of Persulfate on Methylene Blue Degradation under Uv-Vis Light. *Sci Rep*, **2016**, 6, 38520.
- [5] Jia, Z.; Zhang, W.C.; Wang, W.M.; Habibi, D.; Zhang, L.C. Amorphous Fe<sub>78</sub>Si<sub>9</sub>B<sub>13</sub> Alloy: An Efficient and Reusable Photo-Enhanced Fenton-Like Catalyst in Degradation of Cibacron Brilliant Red 3b-a Dye under UV-Vis Light. *Appl. Catal. B: Environ.* **2016**, 192, 46-56.
- [6] Qin, X.; Li, Z.; Zhu, Z.; et al. Mechanism and Kinetics of Treatment of Acid Orange II by Aged Fe-Si-B Metallic Glass Powders. *J. Mater. Sci. Technol.*, **2017**, 33, 1147-1152.
- [7] Liu, P.; Zhang, J.L.; Zha, M.Q.; Chek, C.H. Synthesis of an Fe Rich Amorphous Structure with a Catalytic Effect to Rapidly Decolorize Azo Dye at Room Temperature. *ACS Appl Mater Interfaces*, **2014**, 6, 5500-5505.
- [8] Zhang, C.; Zhu, Z.; Zhang, H.; Hu, Z. Rapid Decolorization of Acid Orange II Aqueous Solution by Amorphous Zero-Valent Iron. *J. Environ. Sci.*, **2012**, 24, 1021-1026.
- [9] Wang, Q.; Chen, M.; Lin, P.; Cui, Z.; Chu, C.; Shen, B. Investigation of FePC Amorphous Alloys with Self-Renewing Behaviour for Highly Efficient Decolorization of Methylene Blue. *J. Mater. Chem. A*, **2018**, 6, 10686-10699.
- [10] Xie, S.; Huang, P.; Kruzic, J.J.; Zeng, X.; Qian, H. A Highly Efficient Degradation Mechanism of Methyl Orange Using Fe-Based Metallic Glass Powders. *Sci. Rep.*, **2016**, 6, 21947.
- [11] Zhang, C.; Zhu, Z.; Zhang, H.; Hu, Z. Rapid Reductive Degradation of Azo Dyes by a Unique Structure of Amorphous Alloys. *Chin. Sci. Bull.*, **2011**, 56, 3988-3992.
- [12] Wang, J.C.; Jia, Z.; Liang, S.X.; Qin, P.; Zhang, W.C.; Wang, W.M.; Sercombe, T.B.; Zhang, L.C. Fe<sub>73.5</sub>Si<sub>13.5</sub>B<sub>9</sub>Cu<sub>1</sub>Nb<sub>3</sub> Metallic Glass: Rapid Activation of Peroxymonosulfate Towards Ultrafast Eosin Y Degradation. *Mater. Des.*, **2018**, 140, 73-84.
- [13] Liang, S.X.; Jia, Z.; Zhang, W.C.; Zhang, L.C. Rapid Malachite Green Degradation Using Fe<sub>73.5</sub>Si<sub>13.5</sub>B<sub>9</sub>Cu<sub>1</sub>Nb<sub>3</sub> Metallic Glass for Activation of Persulfate under Uv-Vis Light. *Mater. Des.*, **2017**, 119, 244-253.
- [14] Jia, Z.; Wang, Q.; Sun, L.; Wang, Q.; Zhang, L.-C.; Wu, G.; Luan, J.-H.; Jiao, Z.-B.; Wang, A.; Liang, S.-X.; Gu, M.; Lu, J. Attractive in situ Self-reconstructed Hierarchical Gradient Structure of Metallic Glass for High Efficiency and Remarkable Stability in Catalytic Performance. *Adv. Funct. Mater.* **2019**, 29 1807857.

- [15] Yang, W.; Wang, Q.; Li, W.; Xue, L.; Liu, H.; Zhou, J.; Mo, J.; Shen, B.L. A Novel Thermal-Tuning Fe-Based Amorphous Alloy for Automatically Recycled Methylene Blue Degradation. *Mater. Des.*, **2019**, 161, 136-146.
- [16] Liang, S-X.; Zhang, W.; Wang, W.; Jia, G.; Yang, W.; Zhang, L.C. Surface Reactivation of Fenipc Metallic Glass: A Strategy for Highly Enhanced Catalytic Behavior. *J Phys. Chem. Solids*, **2019**, 132, 89-98.
- [17] Wang, Q.; Yun, L.; Chen, M.; Xu, D.; Cui, Z.; Zeng, Q.; Lin, P.; Chu, C.; Shen, B. Competitive Effects of Structural Heterogeneity and Surface Chemical States on Catalytic Efficiency of FeSiBPCu Amorphous and Nanocrystalline Alloys. *ACS Appl. Nano Mater.*, **2019**, 2, 214-227.
- [18] Zhao, B.; Zhu, Z.; Qin, X.D.; Li, Z. Zhang, H.F. Highly Efficient and Stable CuZr-based Metallic Glassy Catalysts for Azo Dye Degradation. *J. Mater. Sci. Technol.* **2020**, 46, 88-97,.
- [19] Li, Z.; Qin, X.D.; Zhu, Z.; Zheng, S.; Li, H.; Fu, H.; Zhang, H.F. Cu-based Metallic Glass with Robust Activity and Sustainability for Wastewater Treatment. *J Mater. Chem. A* **2020**, 8, 10855-10864.
- [20] Xing, M.; Xu, W.; Dong, C.; Bai, Y.; Zeng, J.; Zhou, Y.; Zhang, J.; Yin, Y. Metal Sulfides as Excellent co-catalyst for H<sub>2</sub>O<sub>2</sub> Decomposition in Advanced Oxidation Processes. *Chem*, **2018**, 4, 1359-1372.
- [21] Fan, J.; Guo, Y.; Wang, J.; Fan, M. Rapid Decolorization of Azo Dye Methyl Orange in Aqueous Solution by Nanoscale Zerovalent iron Particles. *J. Hazard. Mater.* **2009**, 166, 904-910.
- [22] Nam, S.; Tratnyek, P. Reduction of Azo Dyes with Zero-valent Iron. *Water. Res.*, **2000**, 34, 1837-1845.
- [23] Ganiyu, S.; Le, T.; Bechelany, M.; Esposito, G.; Hullebusch, E.D.V.; Oturan, M.A.; Cretin, M. A hierarchical CoFe-layered Double Hydroxide Modified Carbon-felt Cathode for Heterogeneous Electro-Fenton Process. *J. Mater. Chem. A*, **2017**, 5, 3655-3666.
- [24] Wang, J.; Liu, C.; Li, J.; Luo, R.; Hu, X.; Sun, X.; Shen, J.; Han, W.; Wang, L. In-situ Incorporation of Iron-copper Bimetallic Particles in Electrospun Carbon Nanofibers as an Efficient Fenton Catalyst. *Appl. Catal. B: Environ.*, **2017**, 207, 316-325.
- [25] Huang, X.; Hou, X.; Zhao, J.; Zhang, L. Hematite Facet Confined Ferrous ions as High Efficient Fenton Catalysts to Degrade Organic Contaminants by Lower in H<sub>2</sub>O<sub>2</sub> decomposition Energetic Span. *Appl. Catal. B: Environ.*, **2016**, 181, 127-137.
- [26] Bai, C.P.; Gong, W.; Feng, D.; Mo, X. · Qi, Z. Natural Graphite Tailings as Heterogeneous Fenton Catalyst for the Decolorization of Rhodamine B. *Chem. Eng. J.*, **2012**, 197, 306.
- [27] Luo, W.; Zhu, L.; Wang, N.; Tang, H.; Cao, M.; She, Y. Efficient Removal of Organic Pollutants with Magnetic Nanoscaled BiFeO<sub>3</sub> as a Reusable Heterogeneous Fenton-like Catalyst. *Environ. Sci. Technol.*, **2010**, 44, 1789-1791.
- [28] Yang, Z.; Qian, J.; Yu, A.; Pan, B. Singlet Oxygen Mediated Iron-based Fenton-like Catalysis under Nanoconfinement. *Proc Natl Acad Sci USA*, **2019**, 116, 6659-6664.
- [29] Nidheesh, P.; Gandhimathi, R.; Velmathi, S.; Sanjini, N.S. Magnetite as a Heterogeneous Electro Fenton Catalyst for the Removal of Rhodamine B from Aqueous Solution. *RSC Adv.*, **2014**, 4, 5698-5708.

- [30] Zhao, C.; Dong, P.; Liu, Z.; Wu, G.; Wang, S.; Wang, Y.; Liu, F. Facile Synthesis of Fe<sub>3</sub>O<sub>4</sub>/MIL-101 Nanocomposite as an Efficient Heterogeneous Catalyst for Degradation of Pollutants in Fenton-like System. *RSC Adv.*, **2017**, 7, 24453-24461.
- [31] Chen, F.; Xie, S.; Huang, X.; Qiu, X. Ionothermal Synthesis of Fe<sub>3</sub>O<sub>4</sub> Magnetic Nanoparticles as Efficient Heterogeneous Fenton-like Catalysts for Degradation of Organic Pollutants with H<sub>2</sub>O<sub>2</sub>. *J. Hazard. Mater.*, **2017**, 322, 152-162.
- [32] Ma, J.; Yang, Q.; Wen, Y.; Liu, W. Fe-g-C<sub>3</sub>N<sub>4</sub>/Graphitized Mesoporous Carbon Composite as Effective Fenton-like Catalyst in Wide pH Range., *Appl. Catal. B: Environ.*, **2017**, 201, 232-240.
- [33] Ma, C.; Feng, S.; Zhou, J.; Chen, R.; Wang, S. Enhancement of H<sub>2</sub>O<sub>2</sub> Decomposition Efficiency by the co-catalytic Effect of Iron Phosphide on the Fenton Reaction for the Degradation of Methylene Blue. *Appl. Catal. B: Environ.*, **2019**, 259, 118015.
- [34] Alexopoulou, C.; Petala, A.; Frontistis, Z.; Drivas, C.; Kennou, S.; Kondarides, D.I.; Mantzavinos, D. Copper Phosphide and Persulfate Salt: A Novel Catalytic System for Degradation of Aqueous Phase Micro-contaminants. *Appl. Catal. B: Environ.*, **2019**, 244, 178.
- [35] Liang, S.H.; Wang, X.; Zhang, W.; Liu, Y.-J.; Wang, W.; Zhang, L-C. Selective Laser Melting Manufactured Porous Fe-based Metallic Glass Matrix Composite with Remarkable Catalytic Activity and Reusability. *Appl. Mater. Today*, **2020**, 19, 100543.
- [36] Tong, W.; Xie, Y.; Luo, H.Q.; Niu, J.; Ran, W. Phosphorous-Rich Microorganism-Enabled Synthesis of Cobalt Phosphide/Carbon Composite for Bisphenol A Degradation Through Activation of Peroxymonosulfate. *Chem. Eng. J.*, **2019**, 378, 122187.
